# Supplementary figures and images for: Biodegradable alginate derivatives obtained by eco-friendly ultrasound technology for more sustainable leather tanning
Source: Royal Society of Chemistry journal article supplement (doi:10.1039/d4gc06571a), 2025-01-01

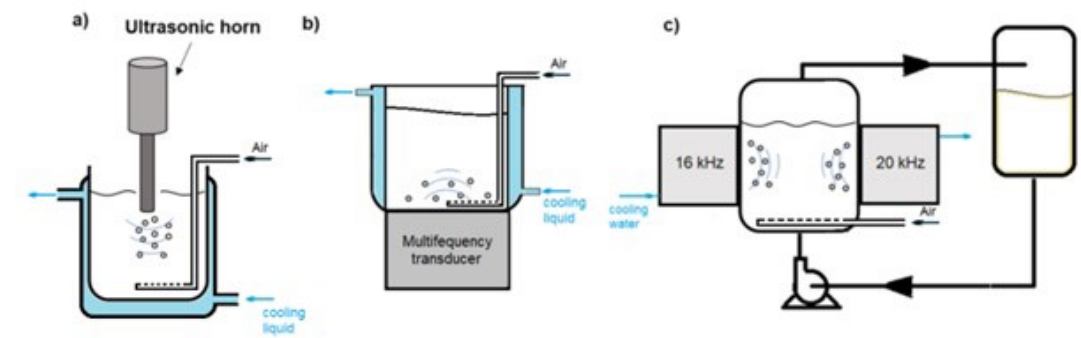

Supplement: d4gc06571a6.pdf [file d4gc06571a6.pdf]

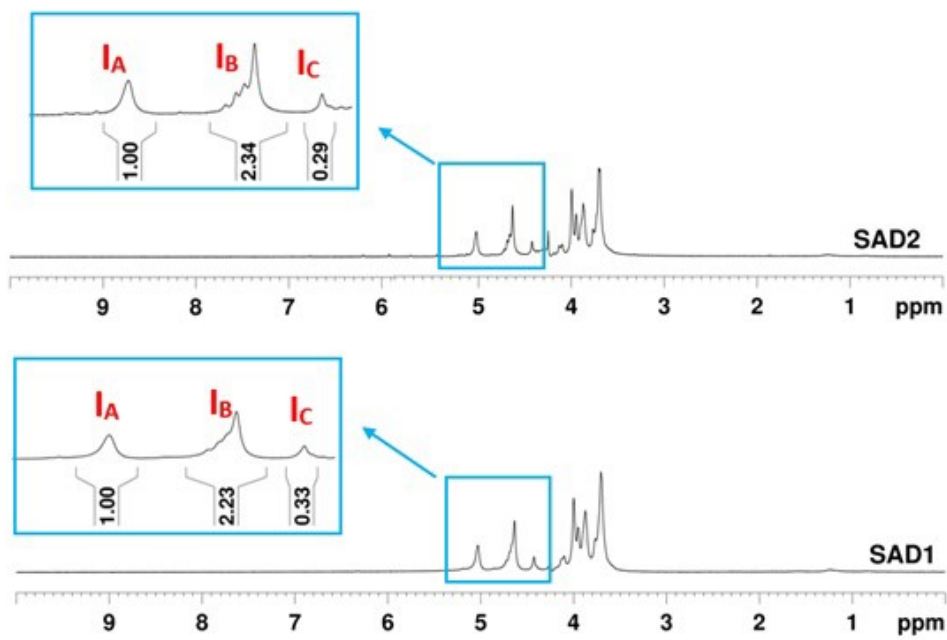

Supplement: d4gc06571a9.pdf [file d4gc06571a9.pdf]
